# Supplementary material for: A rechargeable all-solid-state Li–CO2 battery using a Li1.5Al0.5Ge1.5(PO4)3 ceramic electrolyte and nanoscale RuO2 catalyst
Source: Royal Society of Chemistry journal article supplement (doi:10.1039/d0ta12421d), 2021-01-01
Supplement: d0ta12421d1.pdf [file d0ta12421d1.pdf]

## Supporting Information

### **A Rechargeable All-Solid-State Li-CO<sub>2</sub> Battery Using Li<sub>1.5</sub>Al<sub>0.5</sub>Ge<sub>1.5</sub>(PO<sub>4</sub>)<sub>3</sub> Ceramic Electrolyte and Nanoscale RuO<sub>2</sub> Catalyst**

*Yuemin Du<sup>#</sup>, Yijie Liu<sup>#</sup>, Sixie Yang<sup>#</sup>, Chao Li, Zhu Cheng, Feilong Qiu, Ping He\* and Haoshen Zhou\**

<sup>#</sup>: These authors contributed equally to this work.

Center of Energy Storage Materials & Technology, College of Engineering and Applied Sciences, National Laboratory of Solid State Microstructures, and Collaborative Innovation Center of Advanced Microstructures, Nanjing University, Nanjing 210093, P. R. China.

E-mail: pinghe@nju.edu.cn; hszhou@nju.edu.cn

Prof. H. Zhou

Energy Technology Research Institute, National Institute of Advanced Industrial Science and Technology (AIST), Umezono 1-1-1, Tsukuba 3058568, Japan.

E-mail: hszhou@aist.go.jp

Dr. Y. Liu

Present address: Materials Science and Engineering Program and Texas Materials Institute, The University of Texas at Austin, Austin, TX 78712 (USA).

Keywords: all-solid-state, NASICON-type ceramic solid electrolyte, Li-CO<sub>2</sub> battery, RuO<sub>2</sub> catalyst

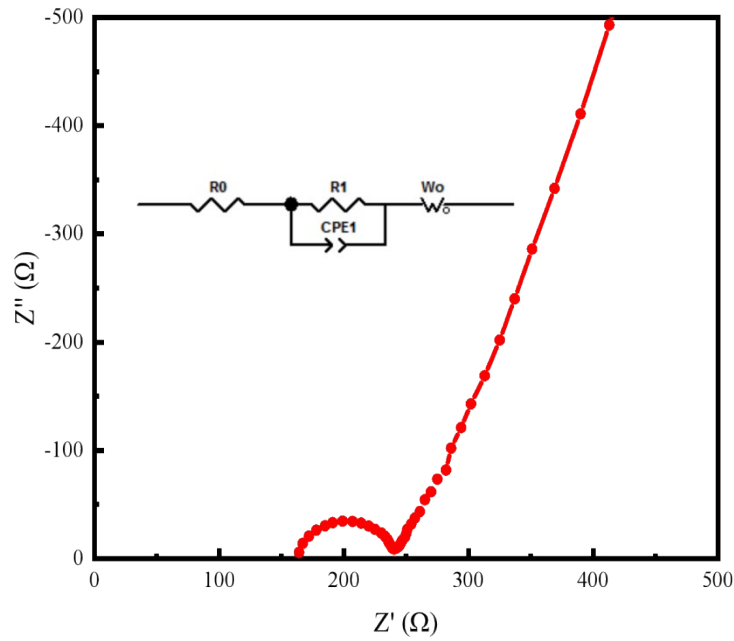

**Figure S1.** The impedance plots of LAGP pellet measured by an Au/LAGP/Au symmetric cell at room temperature

Electrochemical impedance spectroscopy (EIS) was tested with frequency ranging from  $10^6$  to  $10^{-1}$  Hz at AC amplitude of 10 mV. The result of EIS was analyzed by Ziew software and then the ionic conductivity  $\sigma$  was calculated by the following equation:

$$\sigma = \frac{l}{R \times S}$$

( $l$ : the thickness of electrolyte,  $R$ : resistance,  $S$ : the area of electrolyte)

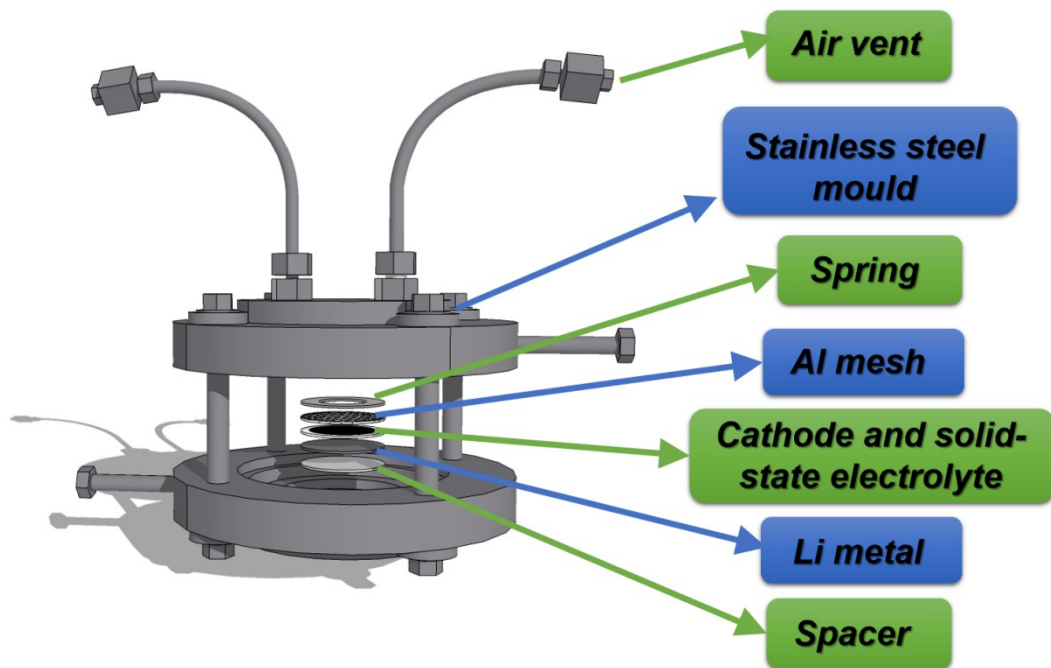

**Figure S2.** The illustration of the mould used in in-situ GC-MS measurement

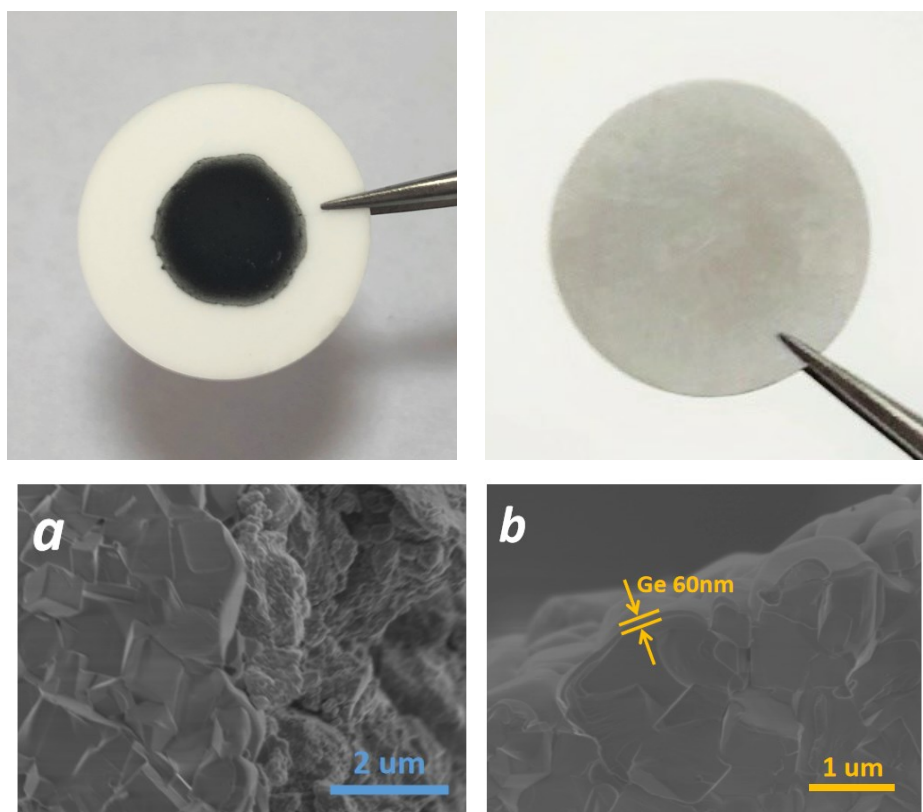

**Figure S3.** Snapshot and SEM images of (a) the cross-section part of the LAGP-cathode and (b) LAGP-Ge

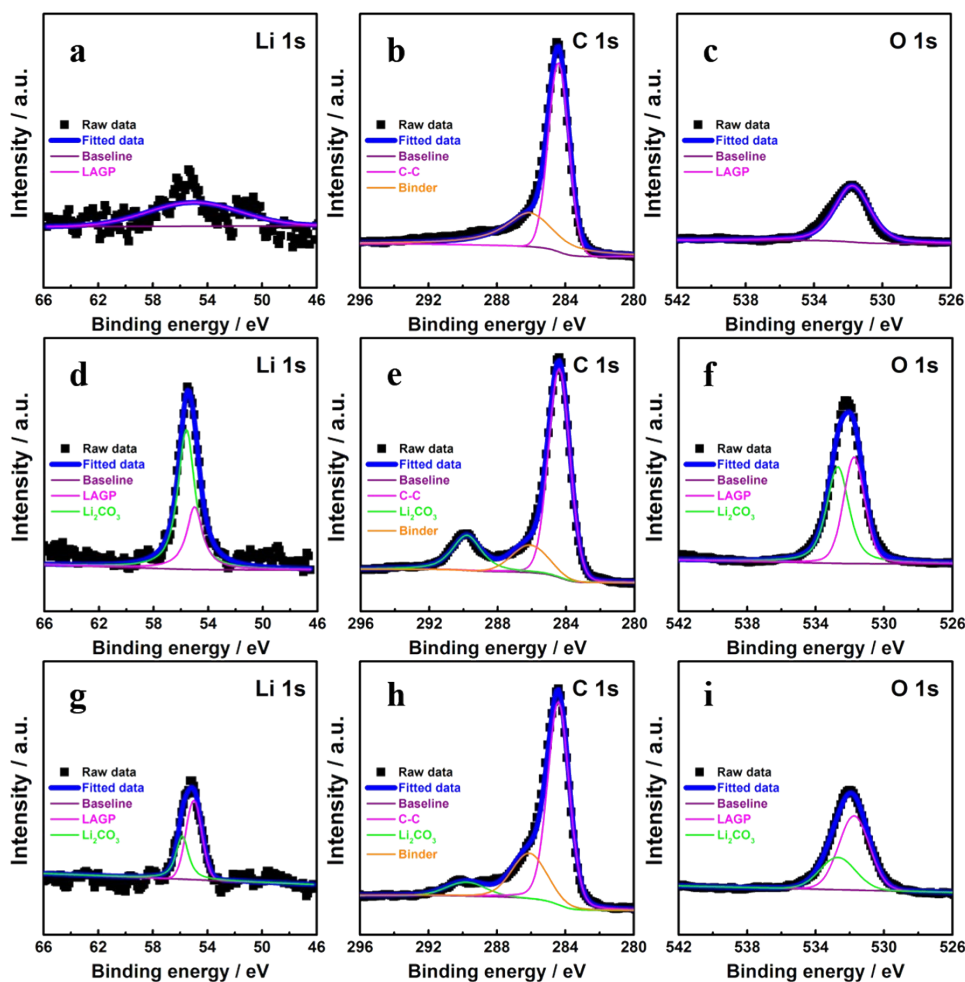

**Figure S4** XPS spectra of the cathode materials (a-c) before discharge, (d-f) after discharge and (g-i) after recharge of the all-solid-state Li-CO<sub>2</sub> battery.

XPS analysis was also employed to characterize the discharge product. The peaks at 55.0 and 55.6 were assigned to LAGP and Li<sub>2</sub>CO<sub>3</sub> in Figure S4 (a), (d) and (g). It can be clearly seen that the peak at 55.6 appeared and weakened when Li<sub>2</sub>CO<sub>3</sub> was produced and deformed at discharge and charge state in Figure S4 (d) and (g), respectively. More obviously, the peak at 289.8 eV can be attributed to the C=O bond in Li<sub>2</sub>CO<sub>3</sub> and those peaks at 284.4 eV and 286.0 can be ascribed to carbon

nanotubes and binders, respectively. The  $\text{Li}_2\text{CO}_3$  peaks notably increased in Figure S4 (e) and then reduced in Figure S4 (h). Besides, the peaks at 531.7 eV and 532.7 eV in Figure S4 (c), (f) and (i) were LAGP and  $\text{Li}_2\text{CO}_3$ , respectively. On the whole, the peaks assigned to  $\text{Li}_2\text{CO}_3$  at 55.6 eV, 289.8 eV and 532.7 eV were simultaneously appeared and weakened corresponding to the formation and decomposition of  $\text{Li}_2\text{CO}_3$  during the electrochemical process in the all-solid-state Li- $\text{CO}_2$  cell.

The current used in GC-MS measurement was 2.4  $\mu\text{A}$ . After integration, it is known that 446 nmol  $\text{CO}_2$  gas was generated after 468 minutes. The chemical reaction of the charge process was  $2\text{Li}_2\text{CO}_3 + \text{C} \rightarrow 3\text{CO}_2 + 4\text{Li}^+ + 4\text{e}^-$ , so the quantity of electric charge can be calculated by the following equation.

$$Q_{\text{power}} = It$$

$$Q_{\text{co}_2} = \frac{4}{3} \times n_{\text{co}_2} \times N_A \times e$$

After calculating, the efficiency of power is

$$\eta = \frac{Q_{\text{co}_2}}{Q_{\text{power}}} = \frac{\frac{4}{3} \times 446 \times 10^{-9} \times 6.02 \times 10^{23} \times 1.6 \times 10^{-19}}{2.4 \times 10^{-6} \times 468 \times 60} = 84.99\%$$

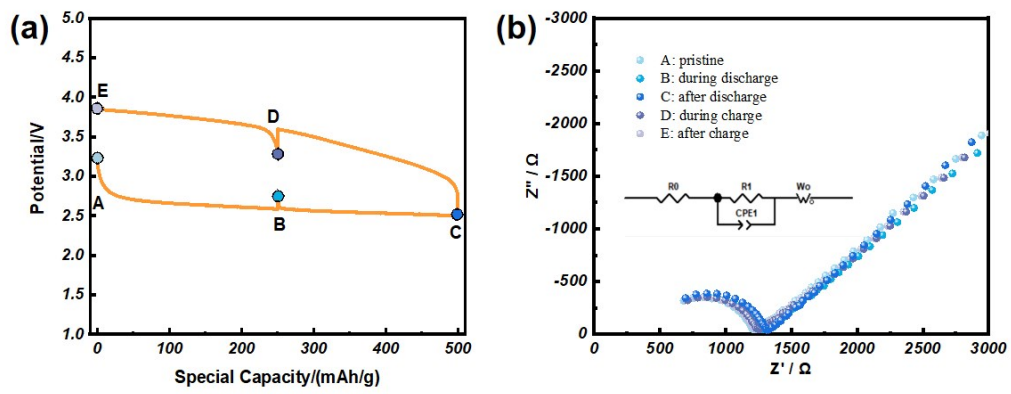

**Figure S5.** (a) charge/discharge voltage profiles and (b) electrochemical impedance plots at different stages of the Li-CO<sub>2</sub> cell



| <b>State</b>  | <b>A</b> | <b>B</b> | <b>C</b> | <b>D</b> | <b>E</b> |
|---------------|----------|----------|----------|----------|----------|
| <b>R0</b>     | 381.3    | 369.4    | 406.3    | 392.6    | 375.1    |
| <b>R1</b>     | 829.6    | 900.06   | 900.3    | 874.3    | 865.1    |
| <b>CPE1-T</b> | 1.804E-9 | 2.055E-9 | 1.398E-9 | 1.942E-9 | 2.149E-9 |
| <b>CPE1-P</b> | 0.87783  | 0.86289  | 0.8955   | 0.87114  | 0.86316  |
| <b>W0-R</b>   | 39369    | 41197    | 22016    | 26835    | 47719    |
| <b>W0-T</b>   | 14.65    | 24.88    | 4.635    | 7.285    | 21.11    |
| <b>W0-P</b>   | 0.52148  | 0.51491  | 0.54291  | 0.51351  | 0.51809  |

**Table S1.** Equivalent Circuits of the Li-CO<sub>2</sub> cell at different stages

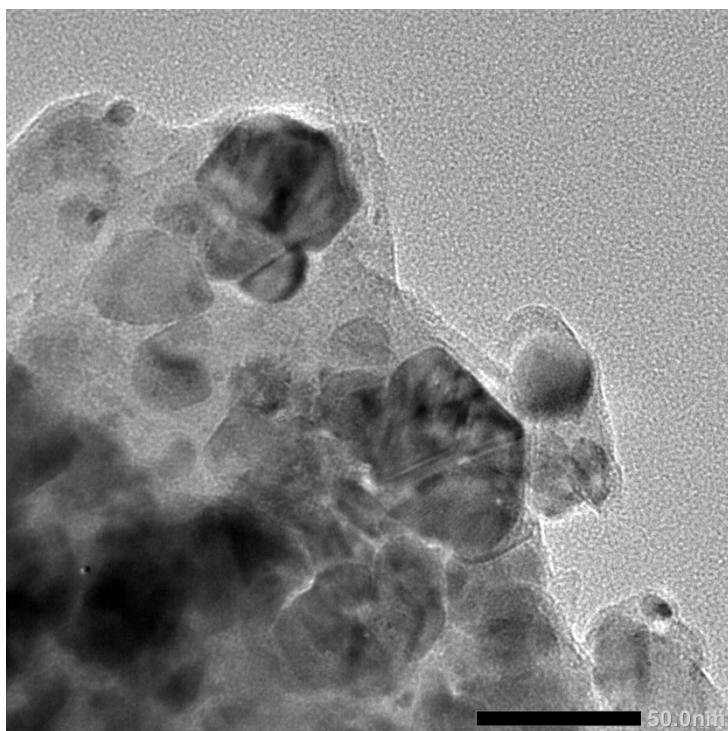

**Figure S6.** A partial enlarged picture of TEM image of the composite cathode material (the mixture of  $\text{RuO}_2$ , SWCNTs and LAGP)

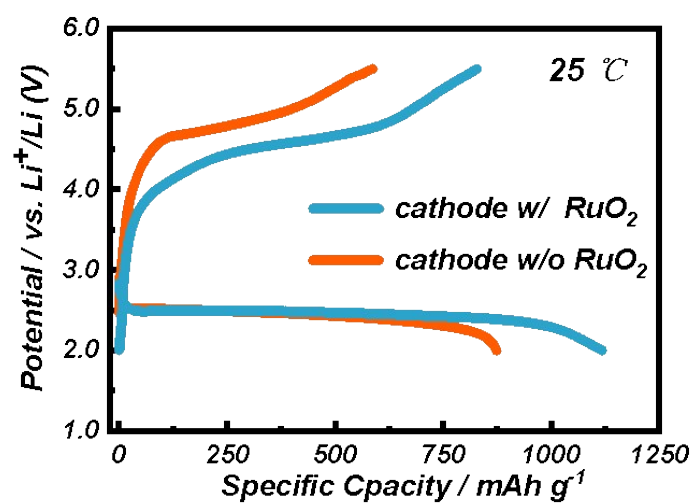

**Figure S7.** Discharge and charge curves of the Li-CO<sub>2</sub> batteries with/without RuO<sub>2</sub> catalyst at 25 °C
